# Supplementary material for: A multi-omics approach to unravel the interaction between heat and drought stress in the Arabidopsis thaliana holobiont
Source: Front Plant Sci. 2024 Dec 19;15:1484251. doi: 10.3389/fpls.2024.1484251 (PMC11693709; doi:10.3389/fpls.2024.1484251)
Supplement: Supplementary file 2 [file Table2.xlsx]

## Sheet: VIP markers
Primary ID	VIP score
heliocide B1	1.34923	0.264058
α-(2,6-anhydro-3-deoxy-D-arabino-heptulopyranosid)onate 7-phosphonate	1.32551	0.505036
protocatechuate	1.31904	0.316268
8-(methylsulfanyl)octyl-glucosinolate	1.31851	0.275762
TRIBOA-β-D-glucoside	1.31745	0.374771
tetrahydrogeranylgeranyl diphosphate	1.31679	0.404343
β-D-cellobiose	1.31629	0.378235
heliocide H1	1.31594	0.35529
(R)-coclaurine	1.31382	0.303725
8-(methylsulfinyl)octyl-glucosinolate	1.31345	0.257356
3,3',5'-trimethylmyricetin	1.30712	0.345103
5-methyl-tetrahydropteroyl-α-glutamylglutamate	1.30601	0.360351
phenylacetaldehyde	1.30104	0.167658
(+)-sesaminol 2-O-β-D-glucoside	1.29935	0.330214
(2R,3S,4S)-leucodelphinidin	1.29849	0.292546
L-threitol	1.29483	0.394424
1-phenylpropane-1,2-dione	1.29318	0.227867
scopolin	1.29264	0.278743
1-16:0-2-18:1-diacylglycerol-trimethylhomoserine	1.29165	0.229665
justicidin B	1.28942	0.313072
2-(2-methylpyridin-3-yl)ethanol	1.28854	0.202799
(E)-9-(methylsulfanyl)nonanal oxime	1.28824	0.22117
meso-diaminopimelate	1.28587	0.188946
(1Z,2S)-2-methylbutanal oxime	1.28044	0.207782
cinnamoylserotonin	1.27933	0.279441
(S)-scoulerine	1.27919	0.279628
(Z)-3-hexanal	1.27582	0.142242
zymosterol	1.27581	0.197689
L-threo-sphinganine (C18)	1.27477	0.180482
lampranthin II	1.27335	0.579174
betalamate	1.27324	0.342203
1,7-dihydroxy-5,6,8-trimethoxyanthraquinone	1.27218	0.203873
(+)-menthofuran	1.27182	0.248745
phylloquinone	1.27118	0.221865
phlorisobutanophenone	1.27102	0.298789
4-(indol-3-yl)butanoate	1.26965	0.423005
10-deoxysarpagine	1.2692	0.267332
baicalein	1.26909	0.178888
1-stearoyl-sn-glycerol 3-phosphate	1.26426	0.268079
2-amino-6-carboxamido-7,8-dihydropteridin-4-one	1.26184	0.665944
glutathioselenol	1.26073	0.230371
L-phenylalanine	1.25803	0.242628
5,6-dihydrothymine	1.25626	0.145956
3-O-acetyl-4'-O-demethylpapaveroxine	1.25489	0.719345
indole-3-carboxaldehyde	1.25356	0.272591
3-β-D-galactosyl-sn-glycerol	1.2529	0.338011
benzoyl-β-D-glucopyranose	1.25182	0.561669
(2R,3S,4S)-leucopelargonidin	1.24997	0.272312
abietatriene	1.24541	0.273976
(-)-jasmonoyl-L-valine	1.24379	0.282143
6-methoxymellein	1.24238	0.263823
(S)-2,3,4,5-tetrahydrodipicolinate	1.23927	0.170254
3-epoxy-16-methoxy-2,3-dihydrotabersonine	1.23775	0.200004
3-[(2'-methylsulfanyl)ethyl]malate	1.23719	0.248819
monofluoromethylornithine	1.23712	0.424868
dihydrolipoamide	1.23688	0.267517
trans-5-O-caffeoyl-D-quinate	1.23671	0.407516
thymidine	1.23613	0.209714
7-deoxyloganate	1.236	0.368874
diethylpyrocarbonate	1.23571	0.277939
L-kynurenine	1.23468	0.234816
N-(4-aminobenzoyl)-L-glutamate	1.23441	0.211619
primeverose	1.23388	0.272905
4-nitrophenyl phosphate	1.23354	0.175739
diisopropyl fluorophosphate	1.23214	0.219377
p-coumaroyltriacetate	1.23195	0.399357
p-chlorophenylalanine	1.23149	0.236677
brocresine	1.2311	0.173999
5-methyluridine	1.22986	0.274681
O(2),1,9-trimethylurate	1.2282	0.334289
1,3,7-trimethylurate	1.2282	0.334289
(-)-bursehernin	1.22768	0.376055
dIMP	1.22763	0.381788
D-octopine	1.22718	0.240571
2'-deoxymugineate	1.22582	0.634921
6-methyl-H2-pterin	1.22536	0.26998
juvenile hormone III	1.22525	0.356182
hemigossypol-6-methyl ether	1.22508	0.257354
10,16-dihydroxypalmitate	1.2228	0.302909
N-feruloyltyramine	1.22264	0.258356
5,10-methylenetetrahydropteroate	1.22221	0.113243
ladanein	1.22215	0.331825
DIBOA-β-D-glucoside	1.22182	0.124754
benzylbenzoate	1.22149	0.636088
(6R)-4a-hydroxy-tetrahydrobiopterin	1.22114	0.660861
N-vanillate-L-glutamate	1.22114	0.660861
gibberellin A12	1.21971	0.439059
salvigenin	1.21937	0.312506
(E)-4-(methylsulfanyl)butanal oxime	1.21865	0.314121
4-amino-4-deoxychorismate	1.21496	0.35662
(E)-glutaconate	1.21486	0.379287
6-gingerol	1.21417	0.464194
dimethylselenopropanoate-amine	1.21357	0.213507
isoliquiritigenin 4'-glucoside	1.21319	0.87113
1-18:3-2-18:3-monogalactosyldiacylglycerol	1.21181	0.226049
3-hydroxypropyl-glucosinolate	1.21166	0.314062
3-(1H-indol-3-yl)propanoate	1.21152	0.712213
afrormosin-7-O-glucoside	1.21137	0.508309
N2-acetyl-L-Lysine	1.21062	0.527372
dicyclohexylamine	1.21044	0.37661
p-coumaroyltyramine	1.21042	0.237784
(-)-thujaplicatin	1.21042	0.255099
threose	1.21017	0.332127
3,5-dihydroxybiphenyl	1.20996	0.677376
(R)-mandelonitrile	1.20893	0.357168
1-palmitoyl-2-oleoyl-phosphatidylcholine	1.20857	0.164534
3,4-dihydroxy-5-all-trans-nonaprenylbenzoate	1.20685	0.187425
1,4-naphthoquinone	1.20503	0.143869
4,5-dihydroxyisophthalate	1.205	0.144451
entacapone	1.20432	0.227673
(S)-stylopine	1.20397	0.20551
7,8-dihydropteroate	1.20361	0.290201
2-S-cysteinyldopa	1.20352	0.215743
L-dehydro-ascorbate	1.20342	0.146355
S-methyl-5'-thioadenosine	1.20339	0.217891
precorrin-1	1.20264	0.186532
rishitin	1.20202	0.406634
4-guanidinobutyramide	1.2016	0.274013
gibberellin A14-aldehyde	1.2011	0.370551
all-trans-retinal	1.20054	0.272627
(-)-medicarpin	1.20053	0.377643
1-α-linolenoyl-2-oleoyl-phosphatidylcholine	1.20022	0.284262
dUDP	1.20013	0.343861
